# Supplementary material
Source: Springer Nature journal article supplement (https://www.springermedizin.de/resource/supplementary/12885_2012_3826_MOESM2_ESM.pdf/9464508)

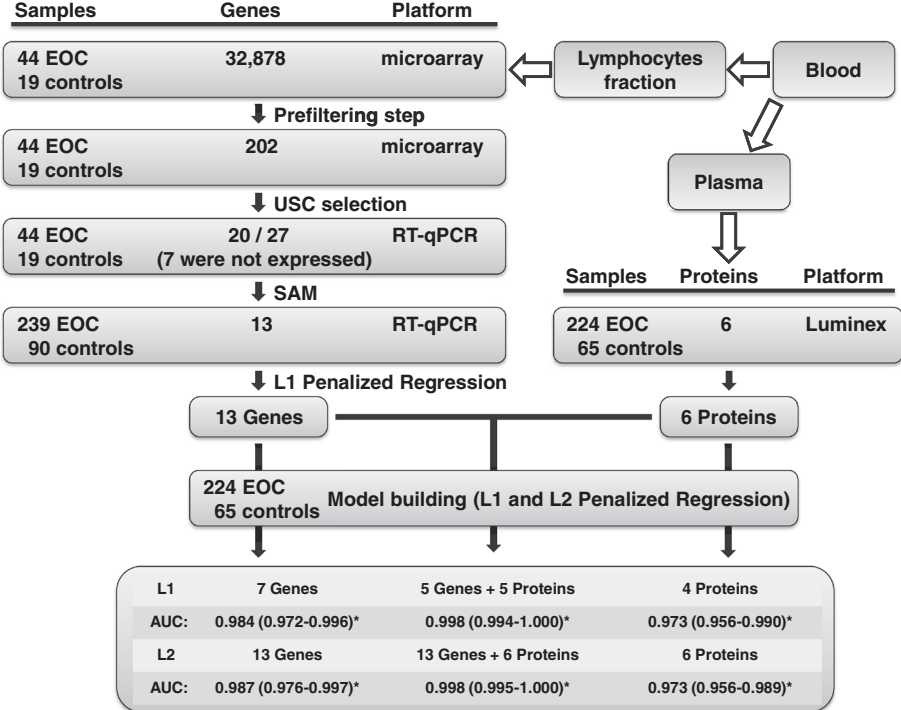

\*p < 0.001

Supplement: MOESM2 [file 9464508]
